# Supplementary material
Source: PubMed Central journal article supplement (PMC1312377)

**A**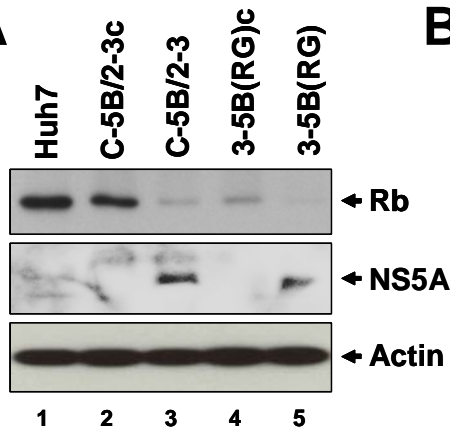**B**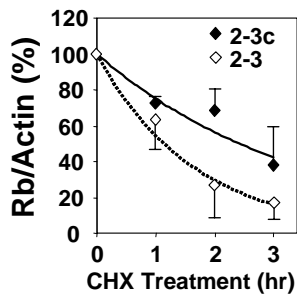**C**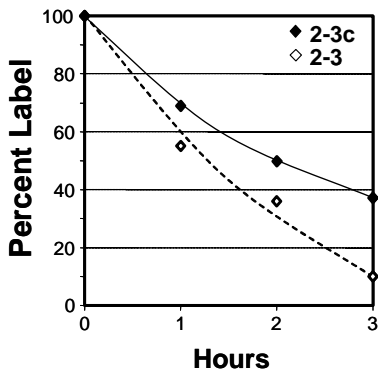

Supplement: pnas_0505605102_1.pdf [file pnas_0505605102_1.pdf]

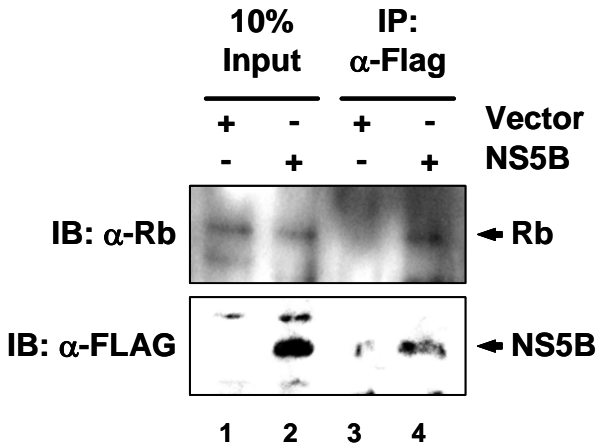

Supplement: pnas_0505605102_2.pdf [file pnas_0505605102_2.pdf]

**A**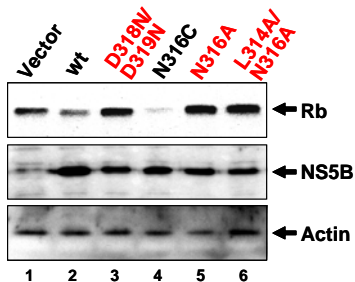**B**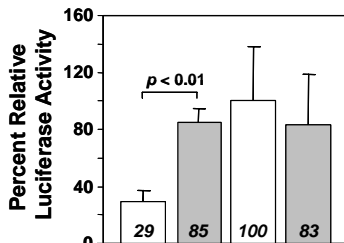

|            |   |   |   |   |
|------------|---|---|---|---|
| p107-luc   | + | + | + | + |
| pORF9-hRb1 | + | + | - | - |
| Rb R661W   | - | - | + | + |
| Vector     | + | - | + | - |
| NS5B       | - | + | - | + |

**C**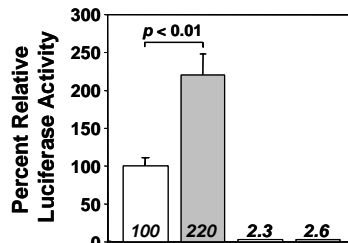

|            |   |   |   |   |
|------------|---|---|---|---|
| p107-luc   | + | + | - | - |
| p107mt-luc | - | - | + | + |
| C-5B/2-3c  | + | - | + | - |
| C-5B/2-3   | - | + | - | + |

Supplement: pnas_0505605102_3.pdf [file pnas_0505605102_3.pdf]

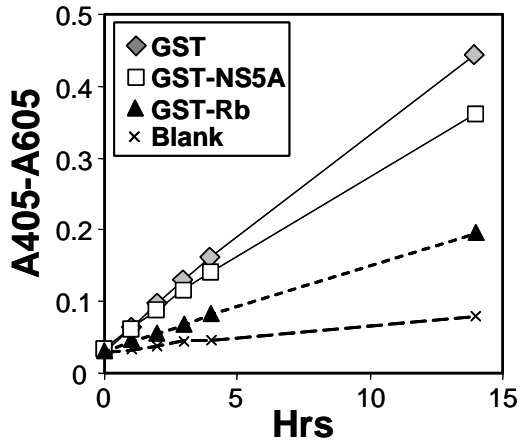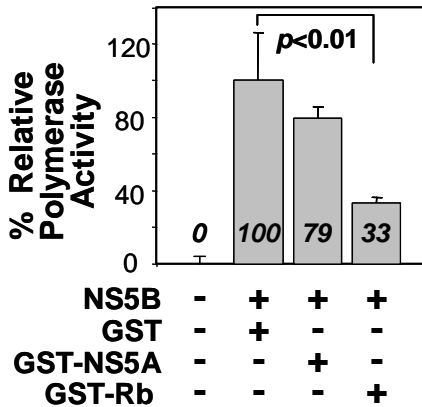

Supplement: pnas_0505605102_4.pdf [file pnas_0505605102_4.pdf]

**A**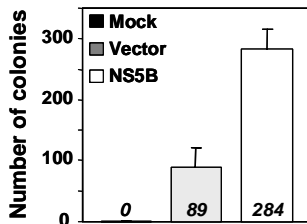**B**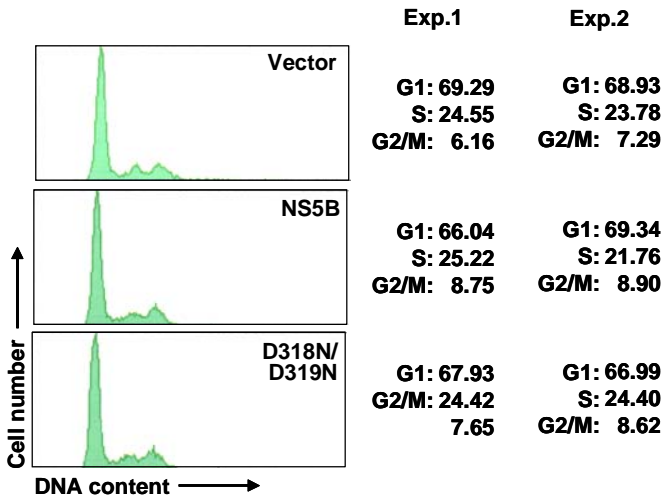

Supplement: pnas_0505605102_5.pdf [file pnas_0505605102_5.pdf]
